# Supplementary material for: Drosophila PDGF/VEGF signaling from muscles to hepatocyte-like cells protects against obesity
Source: bioRxiv preprint, doi:10.1101/2019.12.23.887059, version 2 (2020-03-18)
Supplement: Supplementary Table S1 [file 887059_file02.xlsx]

## Sheet: nNuclei_nGenes_nUMI
Replicate #		No. of nuclei		Median_Genes		Median_UMIs
		Before filter	After filter	Before filter	After filter	Before filter	After filter
1		7811	7213	183	180	387	372
2		8649	8067	206	202	430	418
			Total		Median		Median
			15280		192		397
